# Supplementary material for: A first linkage map and downy mildew resistance QTL discovery for sweet basil (Ocimum basilicum) facilitated by double digestion restriction site associated DNA sequencing (ddRADseq)
Source: PubMed Central journal article supplement (PMC5603166; doi:10.1371/journal.pone.0184319), 2017-09-18

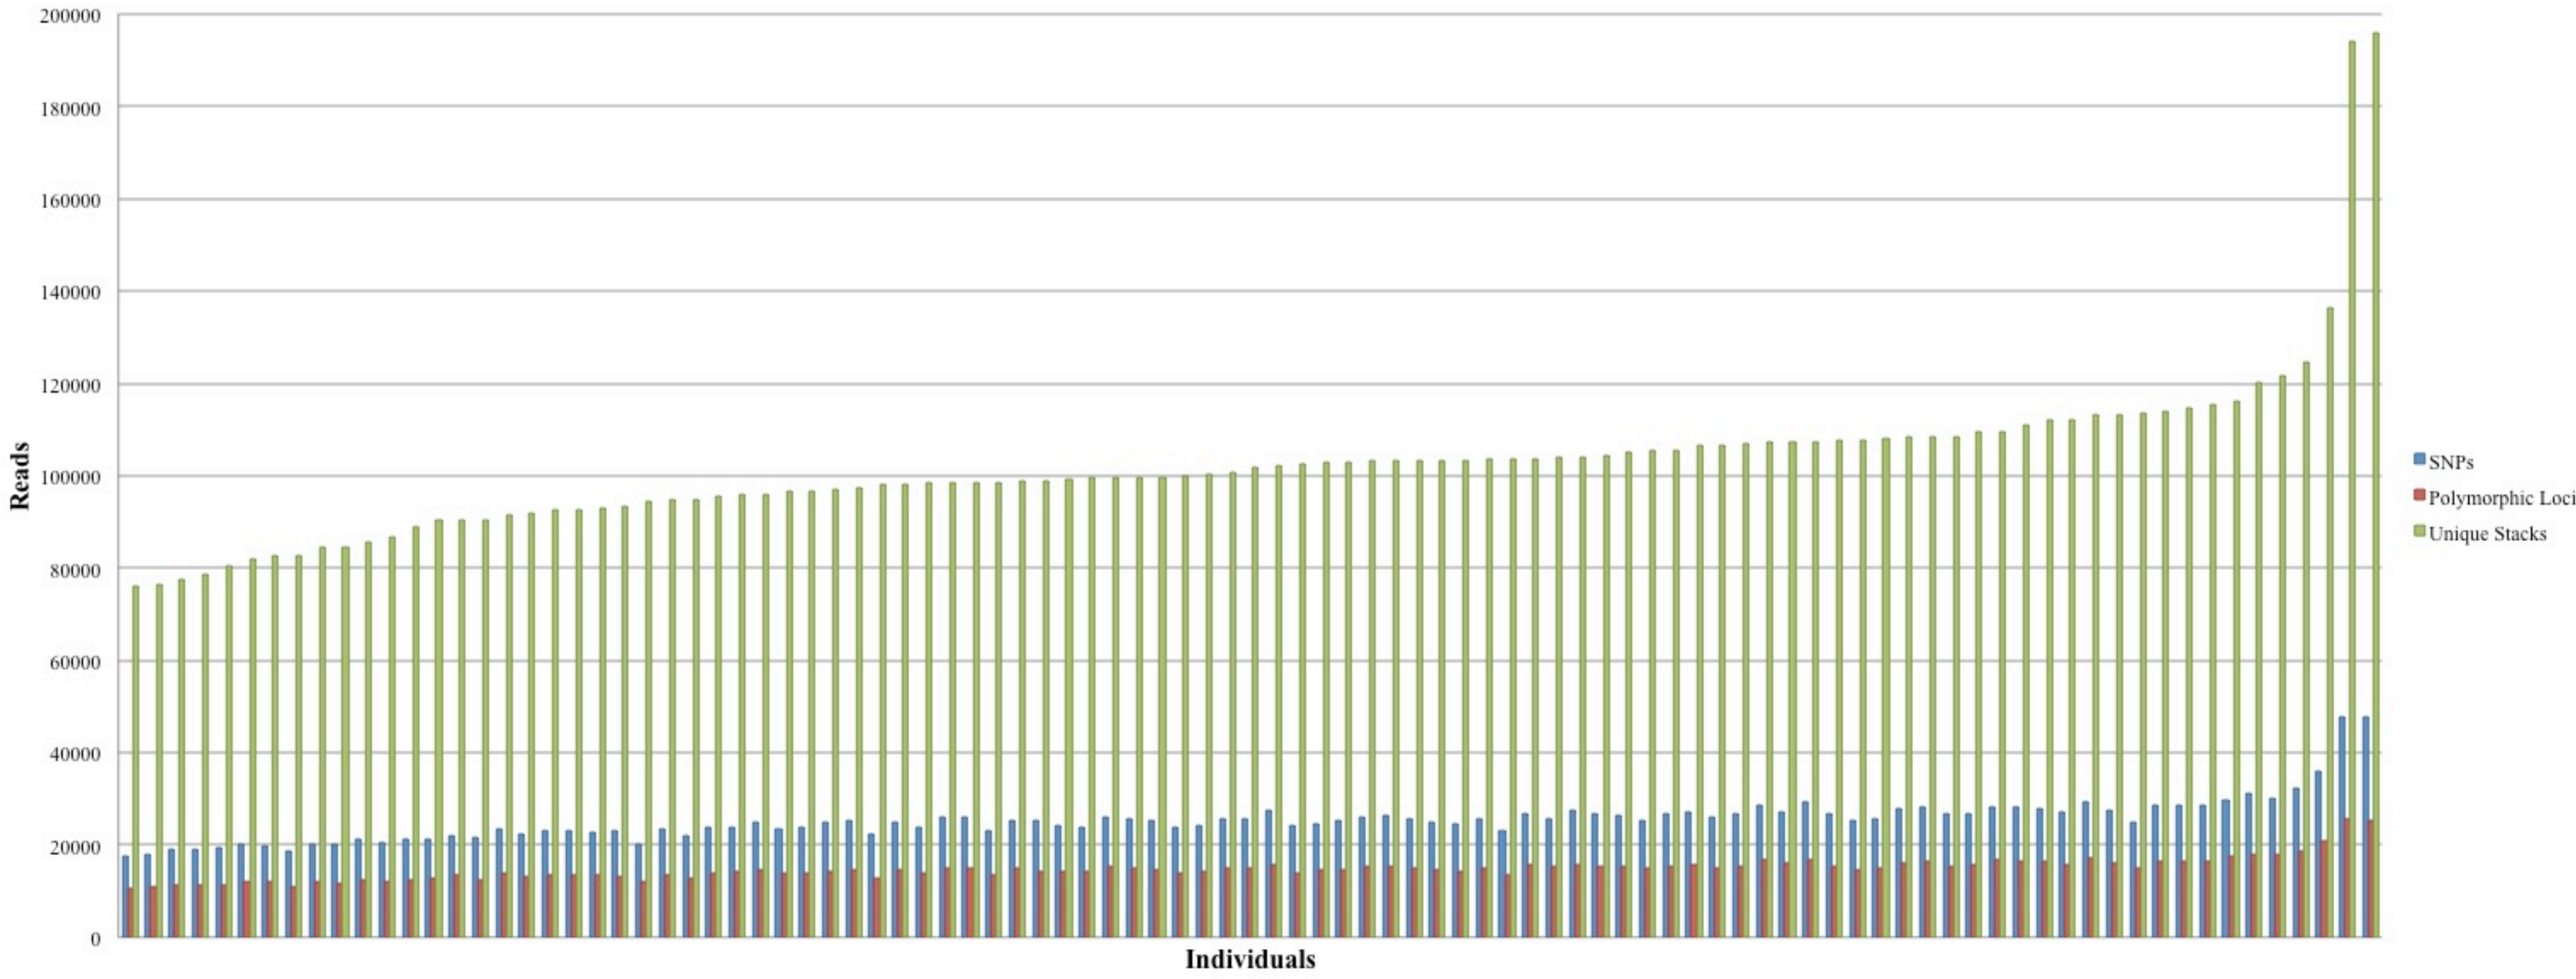

Supplement: pone.0184319.s003.pdf [file pone.0184319.s003.pdf]
